# Supplementary material for: K+ selectivity modulation in non-aqueous CO2 electroreduction on lead catalysts: from oxalic to tartaric acid production
Source: Royal Society of Chemistry journal article supplement (doi:10.1039/d4ta01172d), 2024-01-01
Supplement: d4ta01172d1.pdf [file d4ta01172d1.pdf]

**K<sup>+</sup> selectivity modulation in non-aqueous CO<sub>2</sub> electroreduction on lead catalyst: from oxalic to tartaric acid production**

Eduardo Arizono dos Reis <sup>a,b</sup>, Gelson T. S. T. da Silva<sup>c</sup>, Caue Ribeiro <sup>a-c\*</sup>

<sup>a</sup> *São Carlos Institute of Chemistry, University of São Paulo (USP), São Carlos, São Paulo, Brazil.*

<sup>b</sup> *Nanotechnology National Laboratory for Agriculture (LNNA), Embrapa Instrumentation, São Carlos, São Paulo, Brazil.*

<sup>c</sup> *Department of Chemistry, Federal University of São Carlos (UFSCar), São Carlos, São Paulo, Brazil*

\* Corresponding author: caue.ribeiro@embrapa.com.br  
Tel.: +55 16 2107 2800; fax: +55 16 2107 2902

**Table S1:** Inductively coupled plasma-optical emission spectroscopy (ICP-OES) results for the non-aqueous catholyte after 30 min of electrolysis using different anolytes.

| <b>Anolyte</b>                 | <b>Element concentration (ppm)</b> |          |
|--------------------------------|------------------------------------|----------|
|                                | <b>Pb</b>                          | <b>K</b> |
| H <sub>2</sub> SO <sub>4</sub> | 0.315                              | 0.016    |
| KHCO <sub>3</sub>              | 0.350                              | 247.297  |
| KOH                            | 0.989                              | 566.325  |

**Table S2:** Simulated value for impedance and resistance before and after cyclic voltammetry cleaning process for each anolyte.

| Anolyte                                              | R1 ( $\Omega \text{ cm}^2$ ) | R2 ( $\Omega \text{ cm}^2$ ) | R3 ( $\Omega \text{ cm}^2$ ) | CPE1                  |         | CPE2                  |         |
|------------------------------------------------------|------------------------------|------------------------------|------------------------------|-----------------------|---------|-----------------------|---------|
|                                                      |                              |                              |                              | CPE (T)               | CPE (P) | CPE (T)               | CPE (P) |
| <b>Before Cyclic Voltammetry Cleaning Activation</b> |                              |                              |                              |                       |         |                       |         |
| H <sub>2</sub> SO <sub>4</sub>                       | 5.42                         | 208                          | -                            | $7.38 \times 10^{-5}$ | 0.90    | -                     | -       |
| KHCO <sub>3</sub>                                    | 3.59                         | 7.88                         | 182.2                        | 0.02                  | 0.37    | $1.37 \times 10^{-6}$ | 0.878   |
| KOH                                                  | 5.04                         | 87.43                        | -                            | $1.14 \times 10^{-4}$ | 0.86    | -                     | -       |
| <b>After Cyclic Voltammetry Cleaning Activation</b>  |                              |                              |                              |                       |         |                       |         |
| H <sub>2</sub> SO <sub>4</sub>                       | 4.15                         | 78.70                        | 245.60                       | $3.7 \times 10^{-4}$  | 0.76    | $7.48 \times 10^{-5}$ | 0.97    |
| KHCO <sub>3</sub>                                    | 3.99                         | 14.77                        | 221.3                        | 0.003                 | 0.55    | $7.38 \times 10^{-5}$ | 0.92    |
| KOH                                                  | 5.75                         | 58.66                        | -                            | $1.08 \times 10^{-4}$ | 0.86    | -                     | -       |

**Figure S1: a)** Equivalent electrical circuit used for modelling the Pb plate electrode in  $\text{CO}_2$ -saturated acetonitrile (0.1 M  $\text{TBAPF}_6$ ) with  $\text{KHCO}_3$  analyte before and after the cyclic cleaning process and  $\text{H}_2\text{SO}_4$  after cleaning process. **b)** The equivalent electrical circuit for the Pb plate with  $\text{H}_2\text{SO}_4$  before the cyclic voltammetry cleaning process and  $\text{KOH}$  before and after cyclic cleaning.

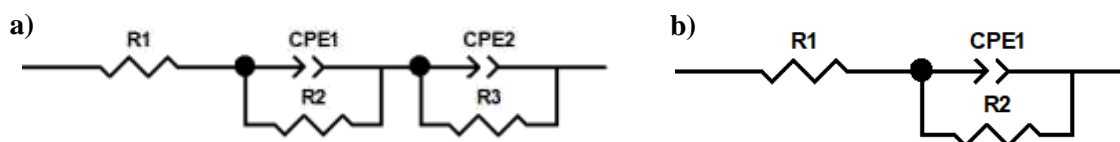

**Figure S2:** Cyclic voltammogram for Pb plate electrode at dried acetonitrile 0.1 M TBAPF<sub>6</sub> saturated with CO<sub>2</sub> using H<sub>2</sub>SO<sub>4</sub>, KHCO<sub>3</sub>, and KOH as anolyte and a scan rate of 20 mV/sec.

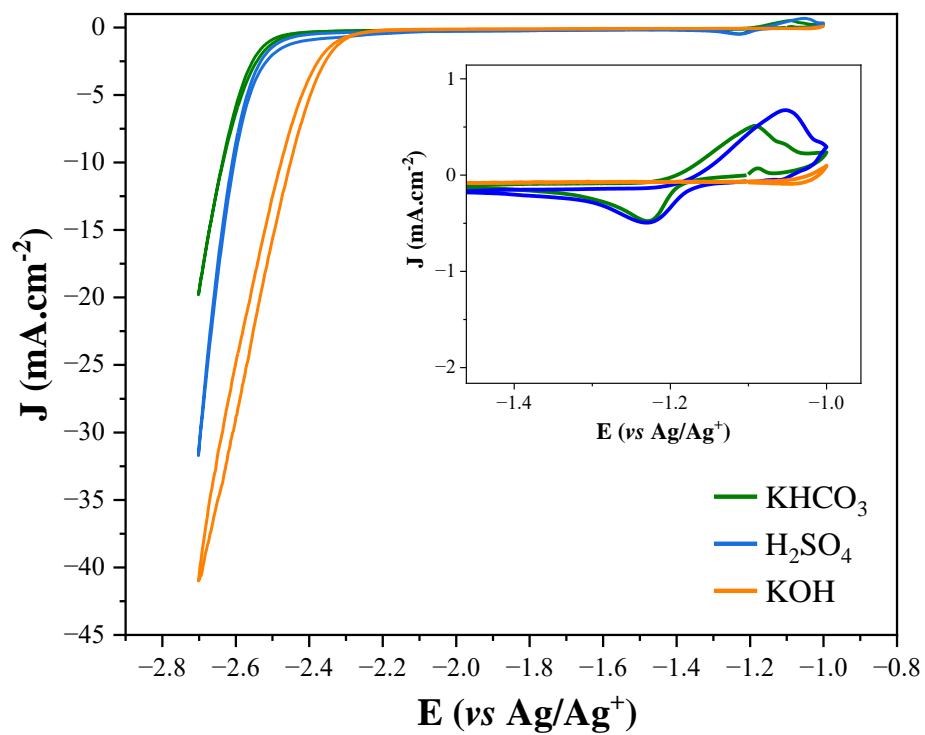

**Figure S3: a)** HPLC-UV calibration curve for the determination of formic acid (0.1–25 mol mL<sup>-1</sup>) water pH 3 (H<sub>2</sub>SO<sub>4</sub>) as mobile phase with flow rate of 0.6 mL/min and sample injection volume of 20 μL and **b)** HPLC chromatogram for each concentration.

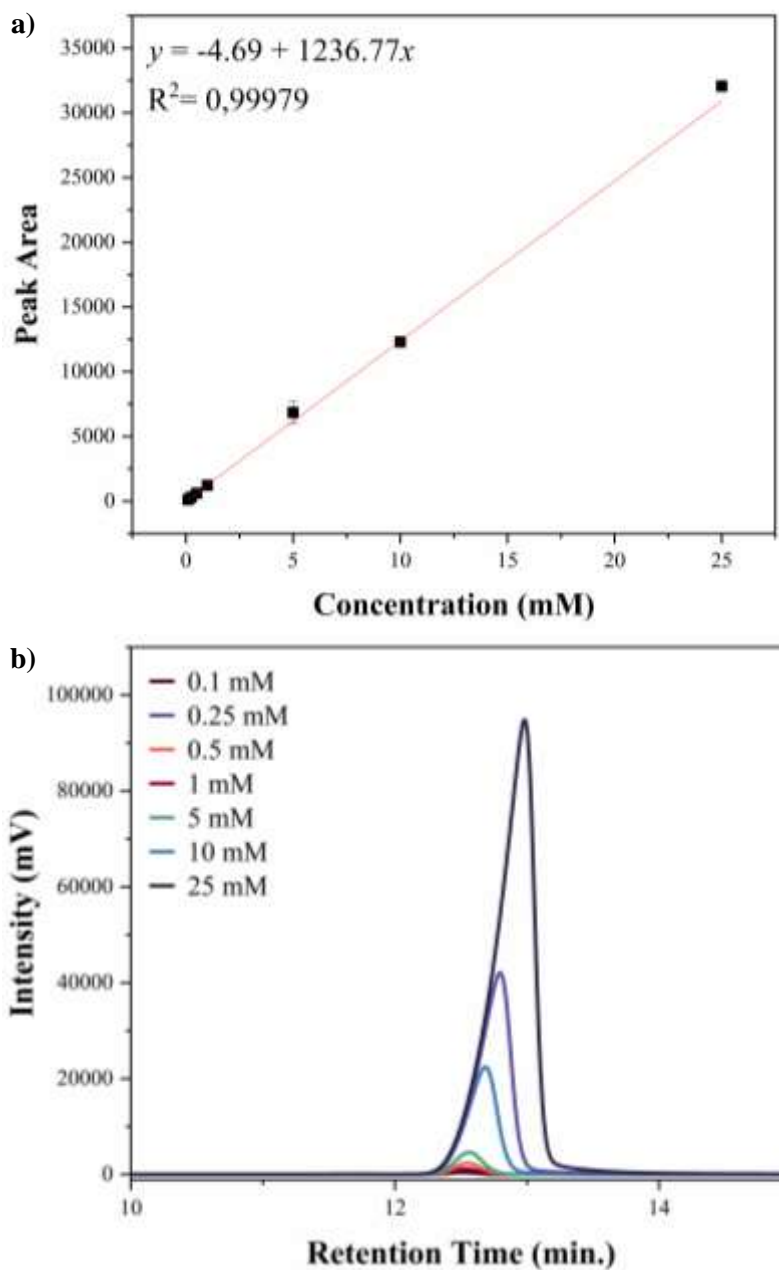

**Figure S4: a)** HPLC-UV calibration curve for the determination of oxalic acid (0.1–5 mol mL<sup>-1</sup>) water pH 3 (H<sub>2</sub>SO<sub>4</sub>) as mobile phase with flow rate of 0.6 mL/min and sample injection volume of 20 μL and **b)** HPLC chromatogram for each concentration.

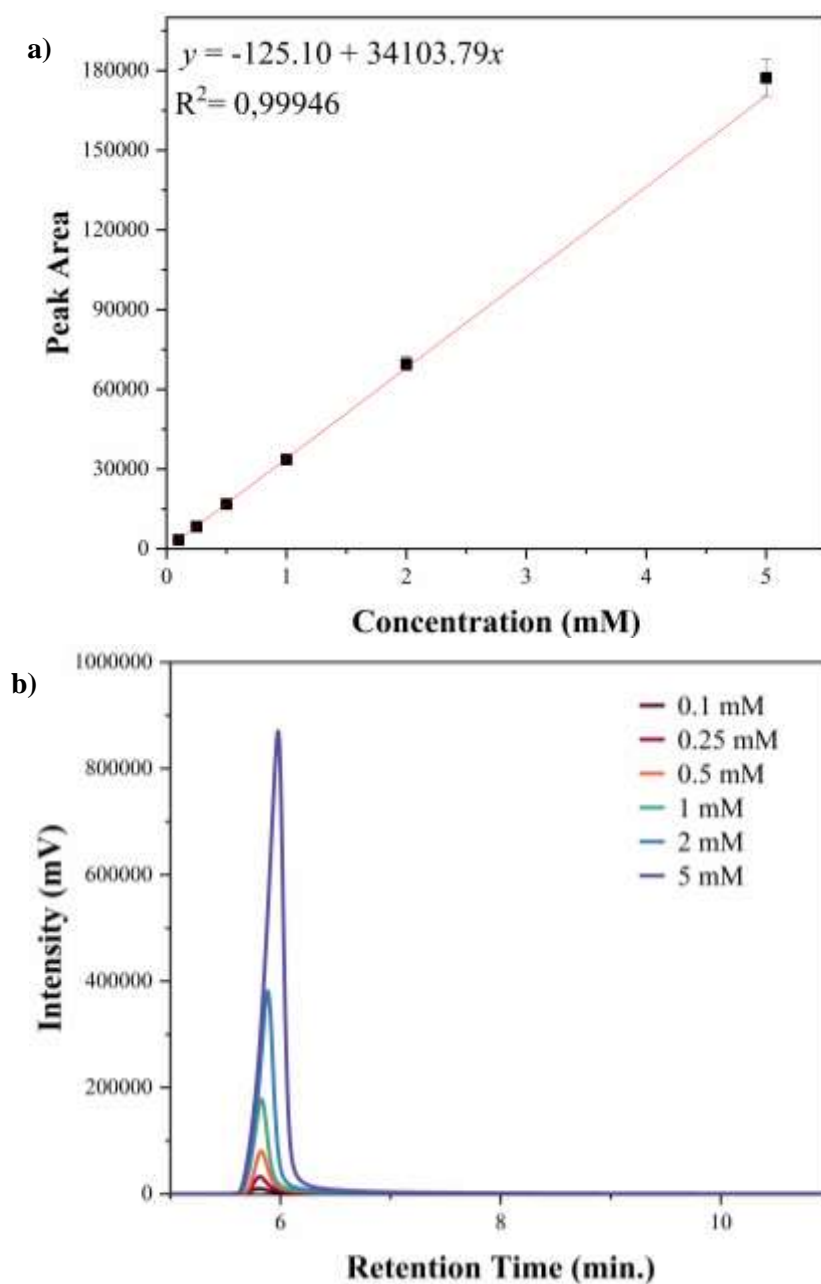

**Figure S5: a)** HPLC-UV calibration curve for the determination of oxalic acid (0.1–0.5 mol mL<sup>-1</sup>) water pH 3 (H<sub>2</sub>SO<sub>4</sub>) as mobile phase with flow rate of 0.6 mL/min and sample injection volume of 20 μL and **b)** HPLC chromatogram for each concentration.

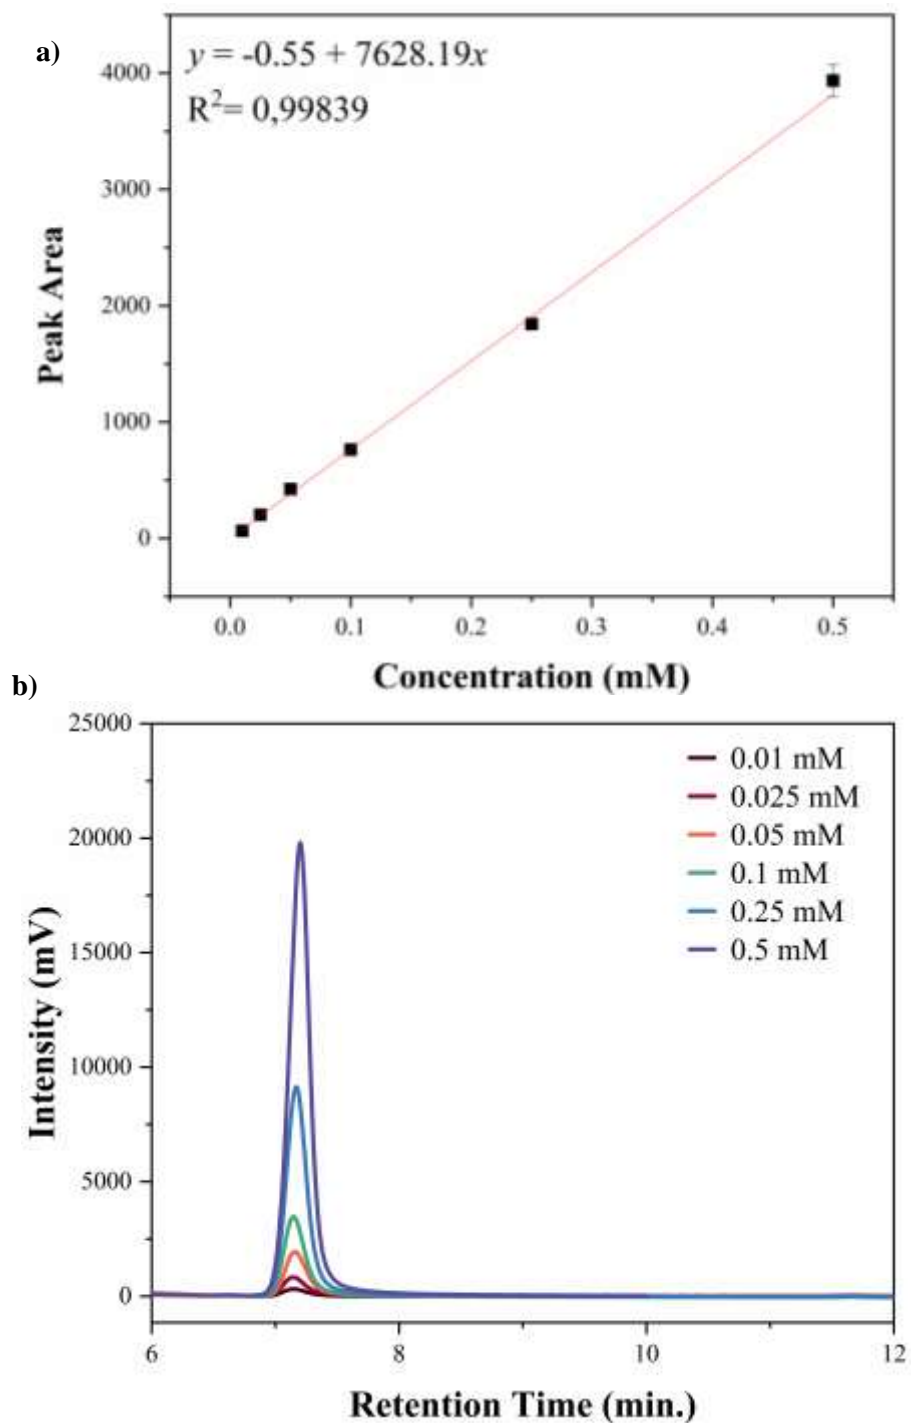



**Figure S6:** HPLC chromatogram of the electrolysis sample using each anolyte ( $\text{H}_2\text{SO}_4$ ,  $\text{KHCO}_3$  and  $\text{KOH}$ ). A: Oxalic acid; B: Tartaric acid; C: Formic acid.

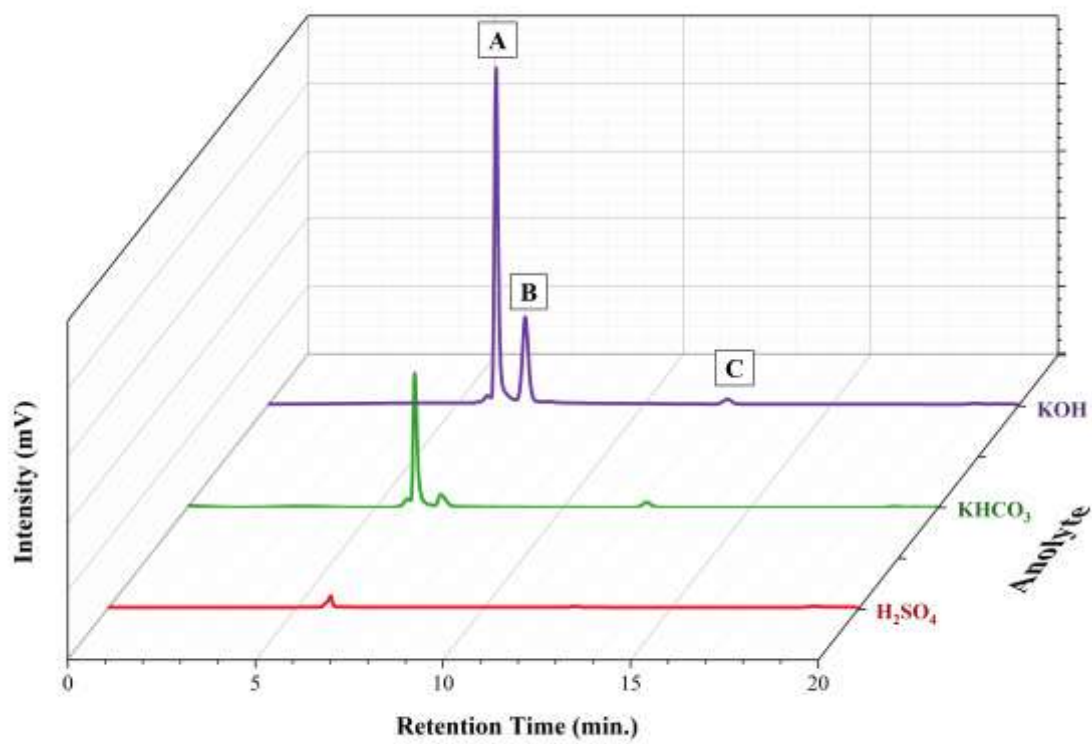

**Table S3:** Comparison of previous literature studies of Pb and Pb-based electrocatalysts for CO<sub>2</sub>RR in organic media with the products and the faradaic efficiency.

| Electrode        | Catholyte                                                                                                 | Anolyte                                                   | Major products                                                                                                   | Cathode Potential or j applied   | FE (%)                                                                                                                | Ref.                 |
|------------------|-----------------------------------------------------------------------------------------------------------|-----------------------------------------------------------|------------------------------------------------------------------------------------------------------------------|----------------------------------|-----------------------------------------------------------------------------------------------------------------------|----------------------|
| <b>Pb Plate</b>  | 0.1 M<br>Bu <sub>4</sub> NPF <sub>6</sub> /AN                                                             | 1.0 M KOH                                                 | C <sub>4</sub> H <sub>4</sub> O <sub>6</sub> <sup>2-</sup><br>and C <sub>2</sub> O <sub>4</sub> <sup>2-</sup>    | -2.3 V vs<br>Ag/Ag               | 60 (C <sub>4</sub> H <sub>4</sub> O <sub>6</sub> <sup>2-</sup> )<br>30 (C <sub>2</sub> O <sub>4</sub> <sup>2-</sup> ) | <b>This<br/>Work</b> |
| <b>Pb</b>        | 0.3 M<br>Et <sub>4</sub> NClO <sub>4</sub> /PC                                                            | 0.1 M<br>H <sub>2</sub> SO <sub>4</sub> /H <sub>2</sub> O | H <sub>2</sub> C <sub>2</sub> O <sub>4</sub>                                                                     | 2.7 V vs.<br>Ag/Ag <sup>+</sup>  | 10 (H <sub>2</sub> C <sub>2</sub> O <sub>4</sub> )                                                                    | 1                    |
| <b>Pb</b>        | 0.1 M<br>Bu <sub>4</sub> NClO <sub>4</sub> /PC                                                            | See<br>catholyte                                          | H <sub>2</sub> C <sub>2</sub> O <sub>4</sub>                                                                     | 2.8 V vs.<br>Ag/AgCl             | 76 (H <sub>2</sub> C <sub>2</sub> O <sub>4</sub> )                                                                    | 2                    |
| <b>Pb sheet</b>  | 0.1 M<br>Bu <sub>4</sub> NClO <sub>4</sub> /AN                                                            | See<br>catholyte                                          | C <sub>2</sub> O <sub>4</sub> <sup>2-</sup>                                                                      | 2.4 V vs.<br>Ag/Ag <sup>+</sup>  | 73 (C <sub>2</sub> O <sub>4</sub> <sup>2-</sup> )                                                                     | 3                    |
|                  | 0.1 M<br>[emim][Tf <sub>2</sub> N]<br>/AN                                                                 | See<br>catholyte                                          | CO                                                                                                               | 2.25 V vs.<br>Ag/Ag <sup>+</sup> | 45 (CO)                                                                                                               |                      |
| <b>Pb sheet</b>  | 0.9 M [TEA][4-<br>MF-PhO]/AN                                                                              | 0.1 M H <sub>2</sub> SO <sub>4</sub>                      | H <sub>2</sub> C <sub>2</sub> O <sub>4</sub>                                                                     | 2.6 V vs.<br>Ag/Ag <sup>+</sup>  | 86 (H <sub>2</sub> C <sub>2</sub> O <sub>4</sub> )                                                                    | 4                    |
|                  | 0.1 M<br>Bu <sub>4</sub> NBF <sub>4</sub> /AN                                                             | 0.1 M H <sub>2</sub> SO <sub>4</sub>                      | HCOOH<br>and H <sub>2</sub> C <sub>2</sub> O <sub>4</sub>                                                        | 2.6 V vs.<br>Ag/Ag <sup>+</sup>  | 67 (HCOOH)<br>20 (H <sub>2</sub> C <sub>2</sub> O <sub>4</sub> )                                                      |                      |
| <b>Pb sheet</b>  | 0.1 M<br>Bu <sub>4</sub> NPF <sub>6</sub> /AN                                                             | 0.1 M H <sub>2</sub> SO <sub>4</sub>                      | CO,<br>HCOOH,<br>and H <sub>2</sub> C <sub>2</sub> O <sub>4</sub>                                                | 2.6 V vs.<br>Ag/Ag <sup>+</sup>  | 21 (CO)<br>66 (HCOOH)<br>11 (H <sub>2</sub> C <sub>2</sub> O <sub>4</sub> )                                           |                      |
|                  | 0.1 M<br>[BMIM][BF <sub>4</sub> ]/<br>AN                                                                  | 0.1 M H <sub>2</sub> SO <sub>4</sub>                      | CO and<br>HCOOH                                                                                                  | 2.6 V vs.<br>Ag/Ag <sup>+</sup>  | 17 (CO)<br>80 (HCOOH)                                                                                                 |                      |
| <b>Pb powder</b> | 0.25 M<br>Bu <sub>4</sub> NBF <sub>4</sub> /AN<br>(CO <sub>2</sub> supplied<br>at the back of<br>the GDE) | See<br>catholyte                                          | C <sub>2</sub> O <sub>4</sub> <sup>-</sup> and<br>CO                                                             | 20-80<br>mA.cm <sup>2</sup>      | At -80<br>mA.cm <sup>2</sup> :<br>53 (C <sub>2</sub> O <sub>4</sub> <sup>-</sup> )                                    | 5                    |
| <b>Pb wire</b>   | 0.7 M<br>Et <sub>4</sub> NCl/PC                                                                           | 0.5 M<br>H <sub>2</sub> SO <sub>4</sub>                   | H <sub>2</sub> C <sub>2</sub> O <sub>4</sub> ,<br>C <sub>2</sub> H <sub>4</sub> O <sub>3</sub> ,<br>and<br>HCOOH | 2.5 V vs.<br>Ag/AgCl             | 71 (H <sub>2</sub> C <sub>2</sub> O <sub>4</sub> )<br>3 (C <sub>2</sub> H <sub>4</sub> O <sub>3</sub> )<br>7 (HCOOH)  | 6                    |
|                  | 0.1 M<br>Et <sub>4</sub> NCl/AN                                                                           | 0.5 M<br>H <sub>2</sub> SO <sub>4</sub>                   | H <sub>2</sub> C <sub>2</sub> O <sub>4</sub> and<br>HCOOH                                                        | 2.5 V vs.<br>Ag/AgCl             | 6 (H <sub>2</sub> C <sub>2</sub> O <sub>4</sub> )<br>82 (HCOOH)                                                       |                      |

|                                                         |                                                |                                          |                                                                                                                                                               |                                       |                                                                                 |    |
|---------------------------------------------------------|------------------------------------------------|------------------------------------------|---------------------------------------------------------------------------------------------------------------------------------------------------------------|---------------------------------------|---------------------------------------------------------------------------------|----|
|                                                         | 0.1 M<br>Bu <sub>4</sub> NClO <sub>4</sub> /PC | 0.5 M<br>H <sub>2</sub> SO <sub>4</sub>  | H <sub>2</sub> C <sub>2</sub> O <sub>4</sub> and<br>HCOOH                                                                                                     | 2.6 V vs.<br>Ag/AgCl                  | 39 (H <sub>2</sub> C <sub>2</sub> O <sub>4</sub> )<br>38 (HCOOH)                |    |
| <b>Pb plate</b>                                         | 0.7 M<br>Et <sub>4</sub> NCl/PC                | 0.5 M<br>H <sub>2</sub> SO <sub>4</sub>  | H <sub>2</sub> C <sub>2</sub> O <sub>4</sub> ,<br>C <sub>2</sub> H <sub>2</sub> O <sub>3</sub> ,<br>C <sub>2</sub> H <sub>4</sub> O <sub>3</sub> and<br>HCOOH | 2.3, 2.4 and<br>2.7 V vs.<br>Ag/AgCl  | At -2.3 V:<br>75 (H <sub>2</sub> C <sub>2</sub> O <sub>4</sub> )<br>20 (HCOOH)  |    |
| <b>MoO<sub>2</sub>/Pb</b>                               | 0.1 M<br>Bu <sub>4</sub> NPF <sub>6</sub> /AN  | See<br>catholyte                         | H <sub>2</sub> C <sub>2</sub> O <sub>4</sub> and<br>HCOOH                                                                                                     | 2.3 - 2.6 V<br>vs. Ag/Ag <sup>+</sup> | At -2.6 V:<br>44 (H <sub>2</sub> C <sub>2</sub> O <sub>4</sub> )<br>5.4 (HCOOH) | 7  |
| <b>PbO/C</b>                                            | 0.1 M<br>Bu <sub>4</sub> NClO <sub>4</sub> /AN | See<br>catholyte                         | C <sub>2</sub> O <sub>4</sub> <sup>2-</sup> and<br>CO                                                                                                         | 1.7 - 2.5 V<br>vs. Ag/Ag <sup>+</sup> | At -2.2 V:<br>50 (C <sub>2</sub> O <sub>4</sub> <sup>2-</sup> )<br>45 (CO)      |    |
| <b>PbSnO<sub>3</sub>/C</b>                              | 0.1 M<br>Bu <sub>4</sub> NClO <sub>4</sub> /AN | See<br>catholyte                         | C <sub>2</sub> O <sub>4</sub> <sup>2-</sup>                                                                                                                   | 1.7 - 2.5 V<br>vs. Ag/Ag <sup>+</sup> | At -1.9 V:<br>85 (C <sub>2</sub> O <sub>4</sub> <sup>2-</sup> )                 | 8  |
| <b>Pb<sub>3</sub>Sn<sub>1</sub>O<sub>x</sub><br/>/C</b> | 0.1 M<br>Bu <sub>4</sub> NClO <sub>4</sub> /AN | See<br>catholyte                         | C <sub>2</sub> O <sub>4</sub> <sup>2-</sup>                                                                                                                   | 1.8 - 2.4 V<br>vs. Ag/Ag <sup>+</sup> | At -2.3 V<br>73(C <sub>2</sub> O <sub>4</sub> <sup>2-</sup> )                   |    |
| <b>Pb<sub>1</sub>Sn<sub>3</sub>O<sub>x</sub><br/>/C</b> | 0.1 M<br>Bu <sub>4</sub> NClO <sub>4</sub> /AN | See<br>catholyte                         | C <sub>2</sub> O <sub>4</sub> <sup>2-</sup>                                                                                                                   | 1.8 - 2.4 V<br>vs. Ag/Ag <sup>+</sup> | At -2.2 V:<br>61 (C <sub>2</sub> O <sub>4</sub> <sup>2-</sup> )                 |    |
| <b>Pb wire</b>                                          | 0.56 M<br>KCl/MeOH                             | 0.56 M H <sub>2</sub> O                  | C <sub>2</sub> H <sub>4</sub> O <sub>2</sub> and<br>HCOOH                                                                                                     | 2.0 V vs.<br>Ag/AgCl                  | 75 (C <sub>2</sub> H <sub>4</sub> O <sub>2</sub> )<br>15 (HCOOH)                | 9  |
| <b>Pb</b>                                               | Sat. KCl + 0.03<br>M HCl/MeOH                  | 0.05 M<br>H <sub>2</sub> SO <sub>4</sub> | C <sub>2</sub> H <sub>4</sub> O <sub>2</sub>                                                                                                                  | 20 mA.cm <sup>-2</sup>                | 97 (C <sub>2</sub> H <sub>4</sub> O <sub>2</sub> )                              | 10 |

## References:

- 1 J. Fischer, Th. Lehmann and E. Heitz, *J Appl Electrochem*, 1981, **11**, 743–750.
- 2 S. Ikeda, T. Takagi and K. Ito, *Bull Chem Soc Jpn*, 1987, **60**, 2517–2522.
- 3 L. Sun, G. K. Ramesha, P. V. Kamat and J. F. Brennecke, *Langmuir*, 2014, **30**, 6302–6308.
- 4 Y. Yang, H. Gao, J. Feng, S. Zeng, L. Liu, L. Liu, B. Ren, T. Li, S. Zhang and X. Zhang, *ChemSusChem*, 2020, **13**, 4900–4905.
- 5 M. König, S. H. Lin, J. Vaes, D. Pant and E. Klemm, *Faraday Discuss*, 2021, **230**, 360–374.
- 6 V. Boor, J. E. B. M. Frijns, E. Perez-Gallent, E. Giling, A. T. Laitinen, E. L. V. Goetheer, L. J. P. van den Broeke, R. Kortlever, W. de Jong, O. A. Moulton, T. J. H. Vlught and M. Ramdin, *Ind Eng Chem Res*, , DOI:10.1021/ACS.IECR.2C02647.
- 7 Y. Oh, H. Vrabel, S. Guidoux and X. Hu, *Chemical Communications*, 2014, **50**, 3878–3881.
- 8 Y. Cheng, P. Hou, H. Pan, H. Shi and P. Kang, *Appl Catal B*, 2020, **272**, 118954.
- 9 D. T. Hofsommer, Y. Liang, S. S. Uttarwar, M. Gautam, S. Pishgar, S. Gulati, C. A. Grapperhaus and J. M. Spurgeon, *ChemSusChem*, 2022, **15**, e202102289.
- 10 D. T. Hofsommer, M. Gautam, S. S. Uttarwar, C. A. Grapperhaus and J. M. Spurgeon, *ACS Appl Energy Mater*, 2023, **6**, 2624–2632.
